# Supplementary material
Source: PubMed Central journal article supplement (PMC3699865)
Supplement: NIHMS486569-supplement-Supporting_Information.pdf [file NIHMS486569-supplement-Supporting_Information.pdf]

## Supporting information

### Biosynthesis of 2-methylisoborneol in cyanobacteria

Giglio, S.<sup>1</sup>, Chou, W.K.W.<sup>2</sup>, Ikeda, H.<sup>3</sup>, Cane D.E.<sup>2</sup>, Monis, P.T.<sup>1</sup>.

<sup>1</sup>Australian Water Quality Centre, South Australian Water Corporation, 250 Victoria Square, Adelaide, SA 5008.

<sup>2</sup>Brown University, Department of Chemistry, Box H, Providence, Rhode Island 02912-9108.

<sup>3</sup>Kitasato Institute of Life Sciences, Kitasato University, 1-15-1 Kitasato, Sagamihara, Kanagawa 228-8555, Japan.

To whom correspondence should be addressed. Email: [steven.giglio@sawater.com.au](mailto:steven.giglio@sawater.com.au)

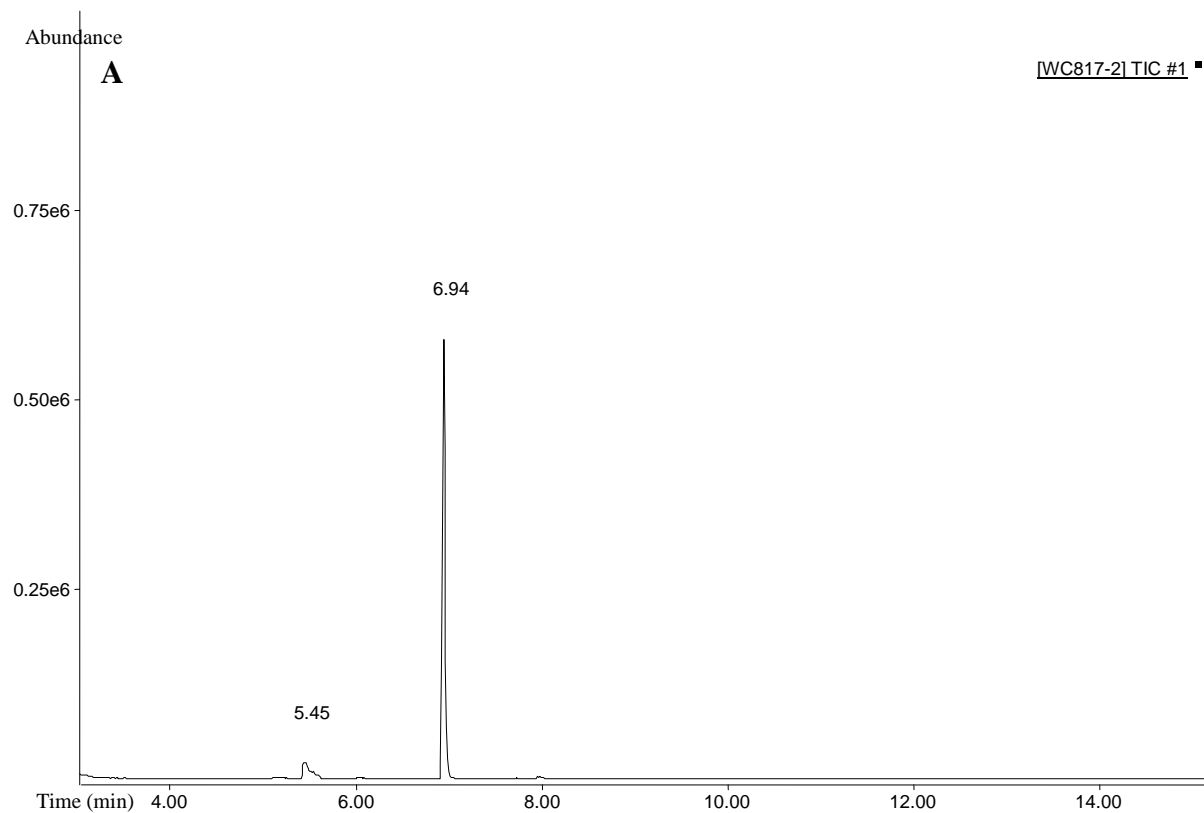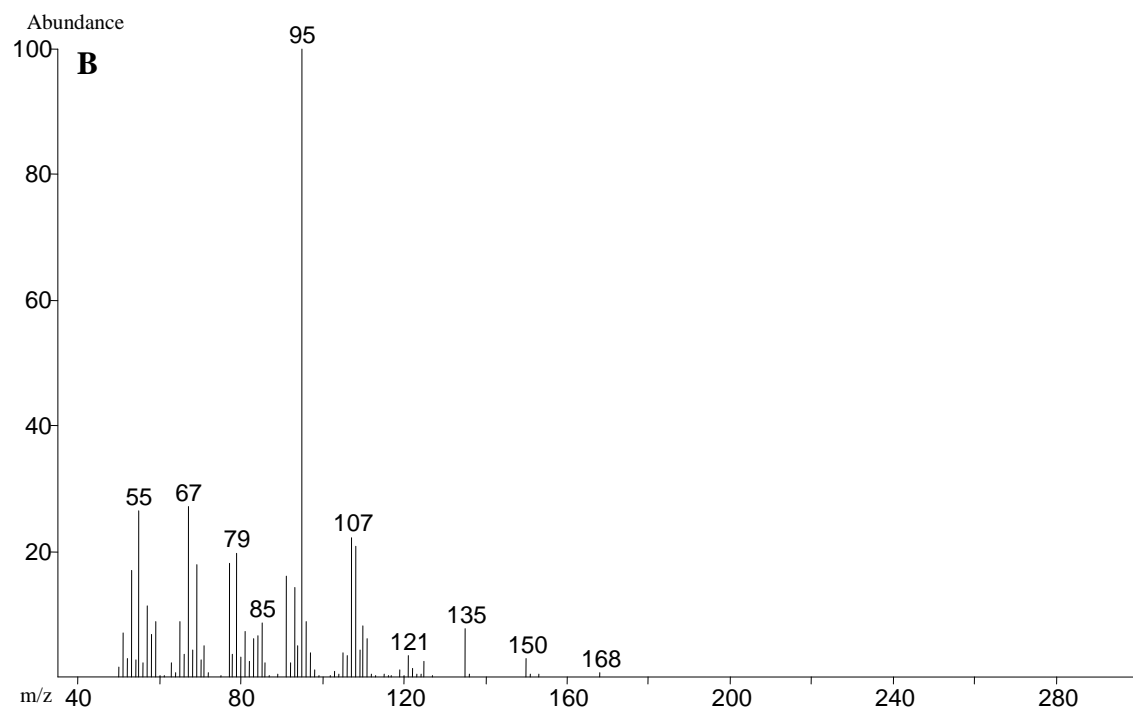

Figure S1. (A) GC-MS TIC of pentane extract from the incubation of 2-Me-GPP (**2**) (60  $\mu$ M) with MIBS. (B) Mass spectrum of MIB (**3**) produced from MIBS incubation.

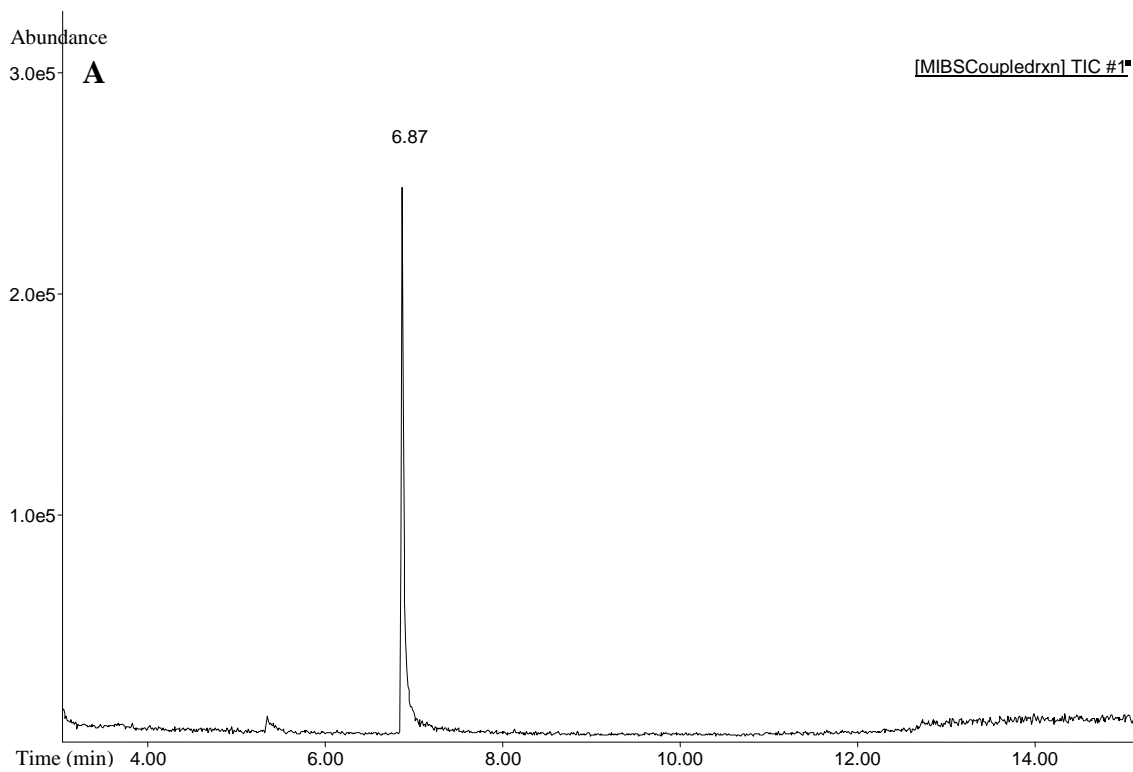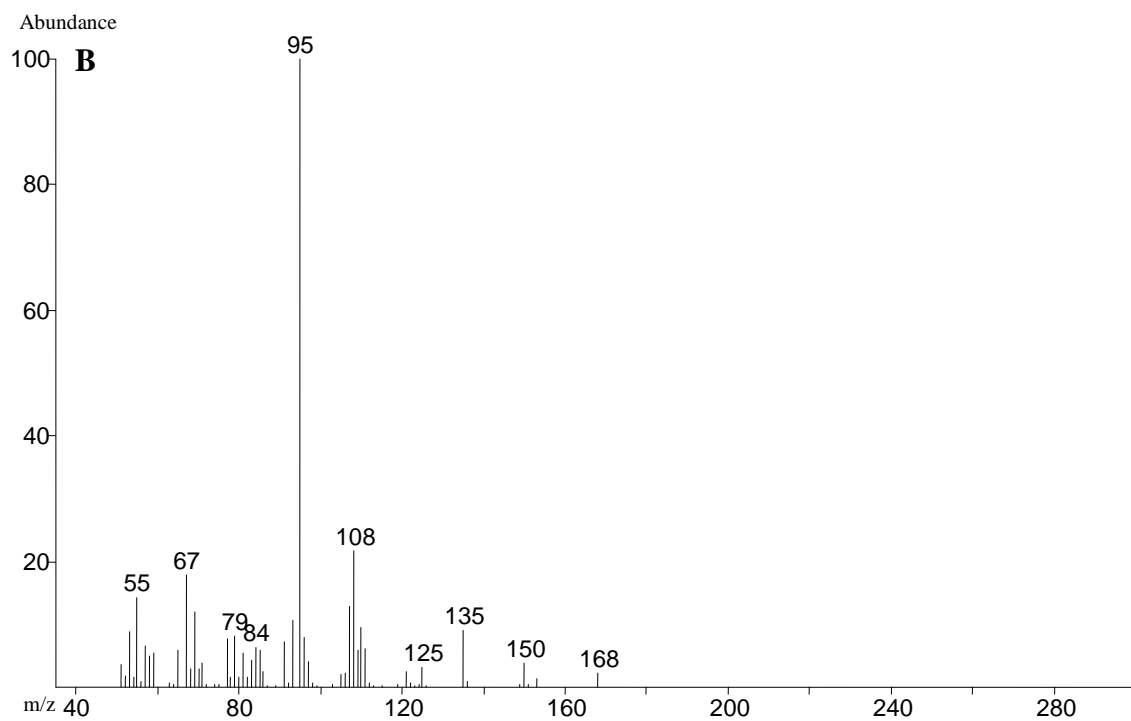

Figure S2. (A) GC-MS TIC of pentane extract from the coupled incubation of GPP (**1**) (60  $\mu$ M) and SAM (120  $\mu$ M) with GPPMT and MIBS. (B) Mass spectrum of MIB (**3**) produced from coupled GPPMT and MIBS incubation.

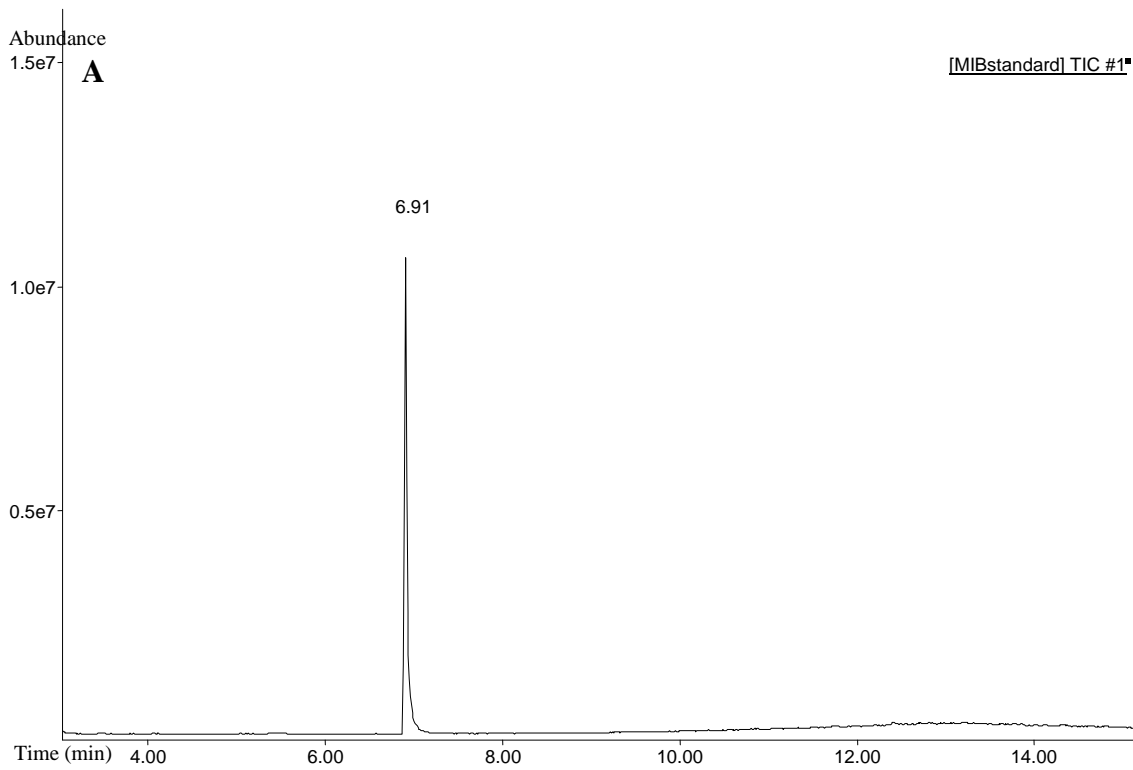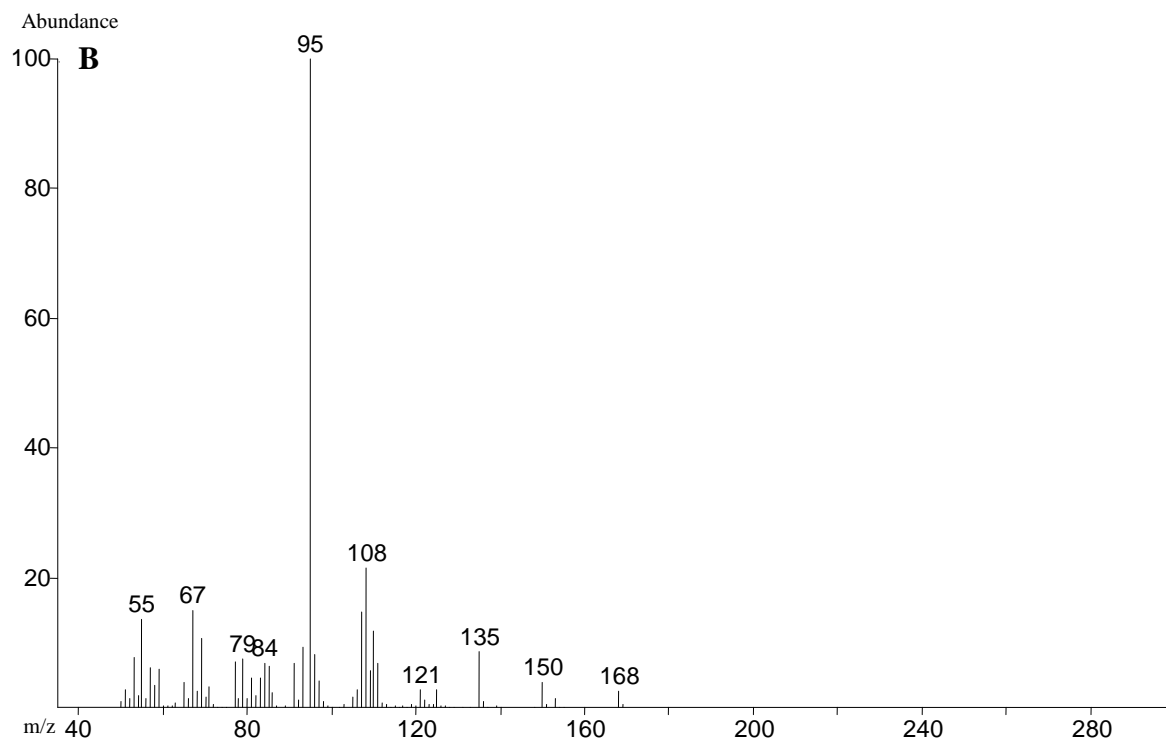

Figure S3. (A) GC-MS TIC of MIB (**3**) standard. (B) Mass spectrum of MIB (**3**) standard.

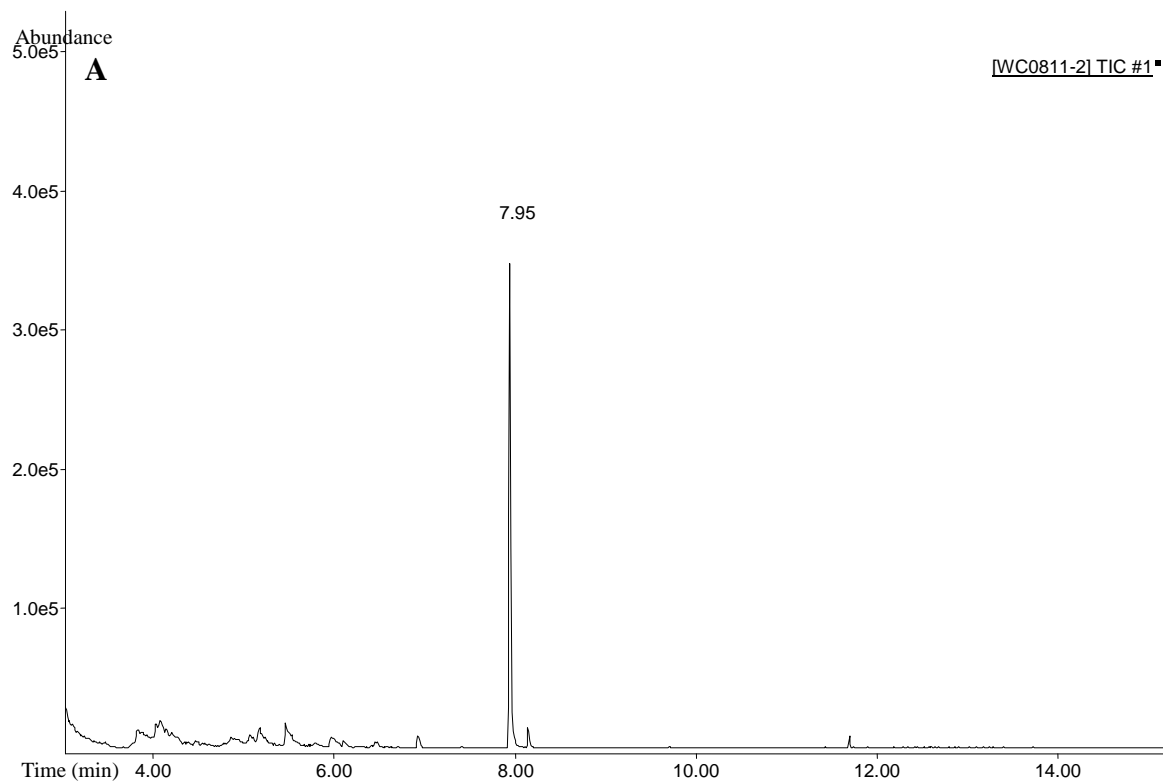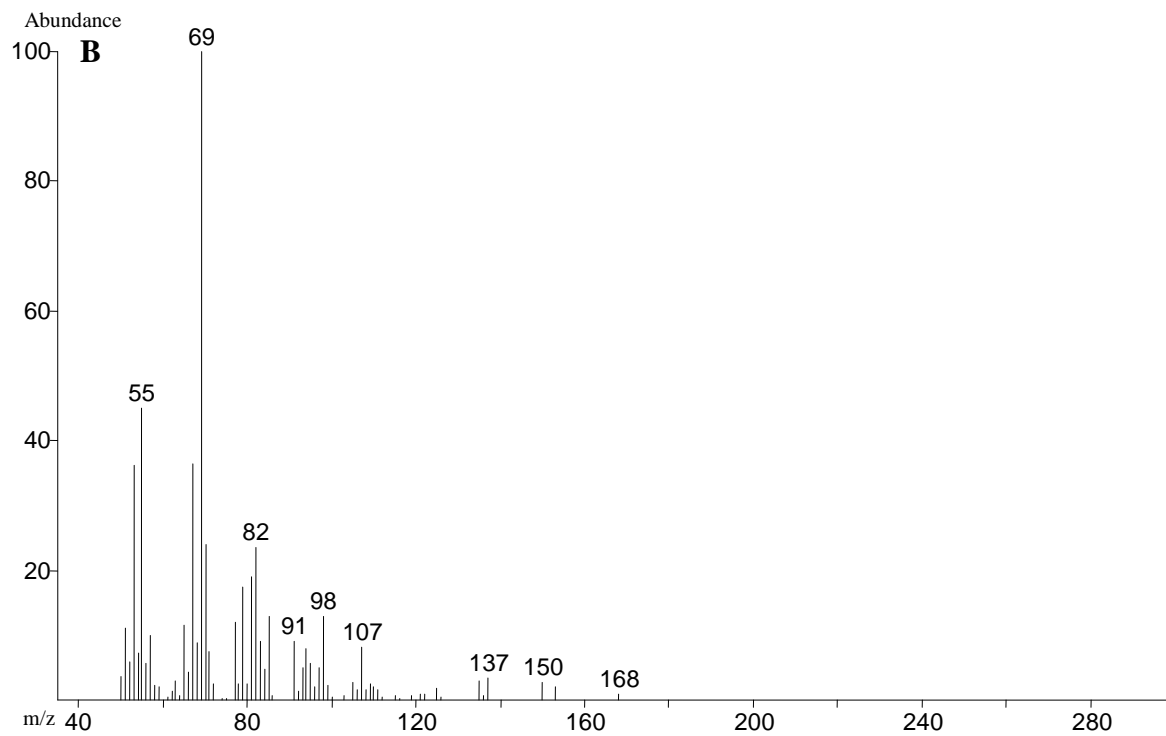

Figure S4. (A) GC-MS TIC of pentane extract from the incubation of GPP (**1**) (60  $\mu$ M) and SAM (120  $\mu$ M) with GPPMT (10  $\mu$ M), followed by incubation with phosphatases. (B) Mass spectrum of E-2-methylgeraniol (**4**) produced from GPPMT and phosphatase incubation.

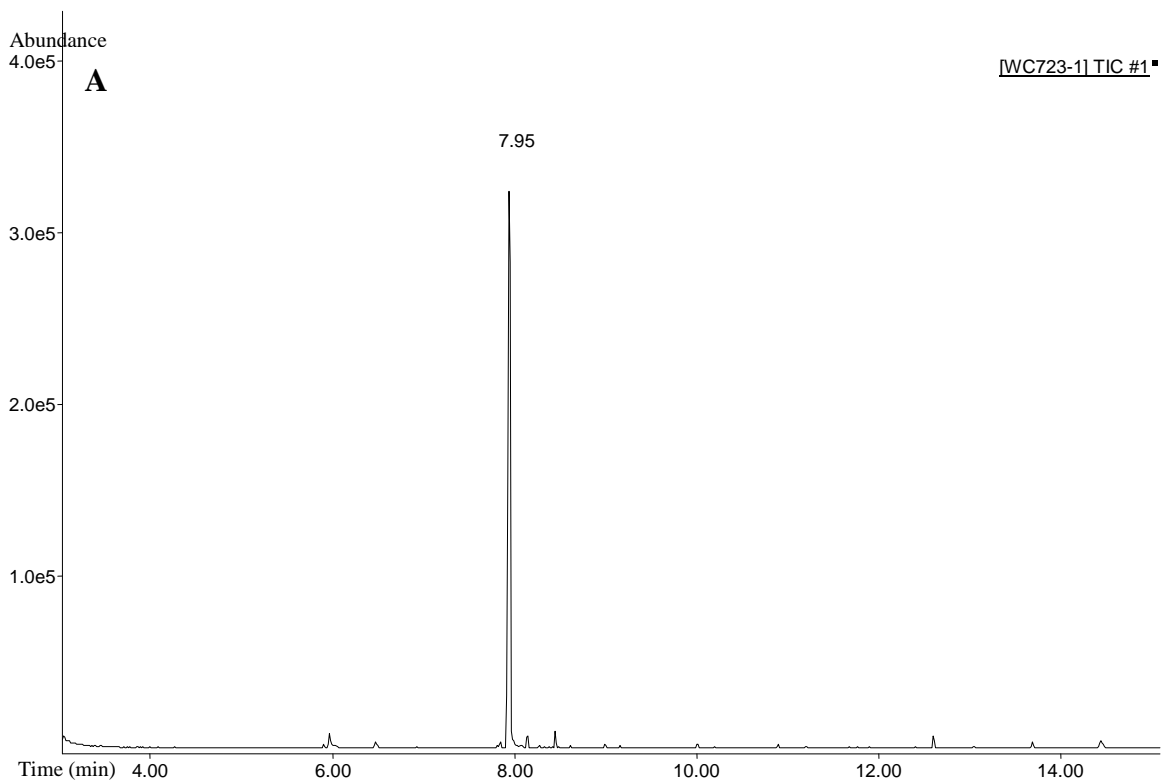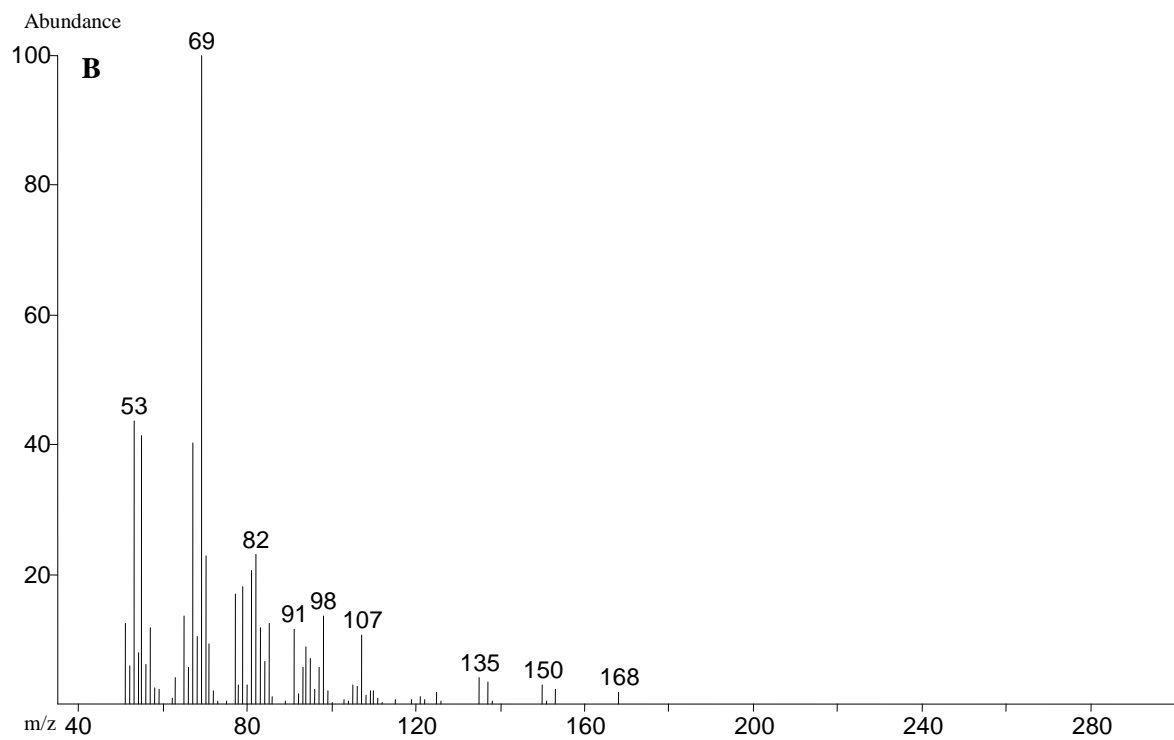

Figure S5. (A) GC-MS TIC of synthetic E-2-methylgeraniol (**4**) standard. (B) Mass spectrum of synthetic E-2-methylgeraniol (**4**) standard.

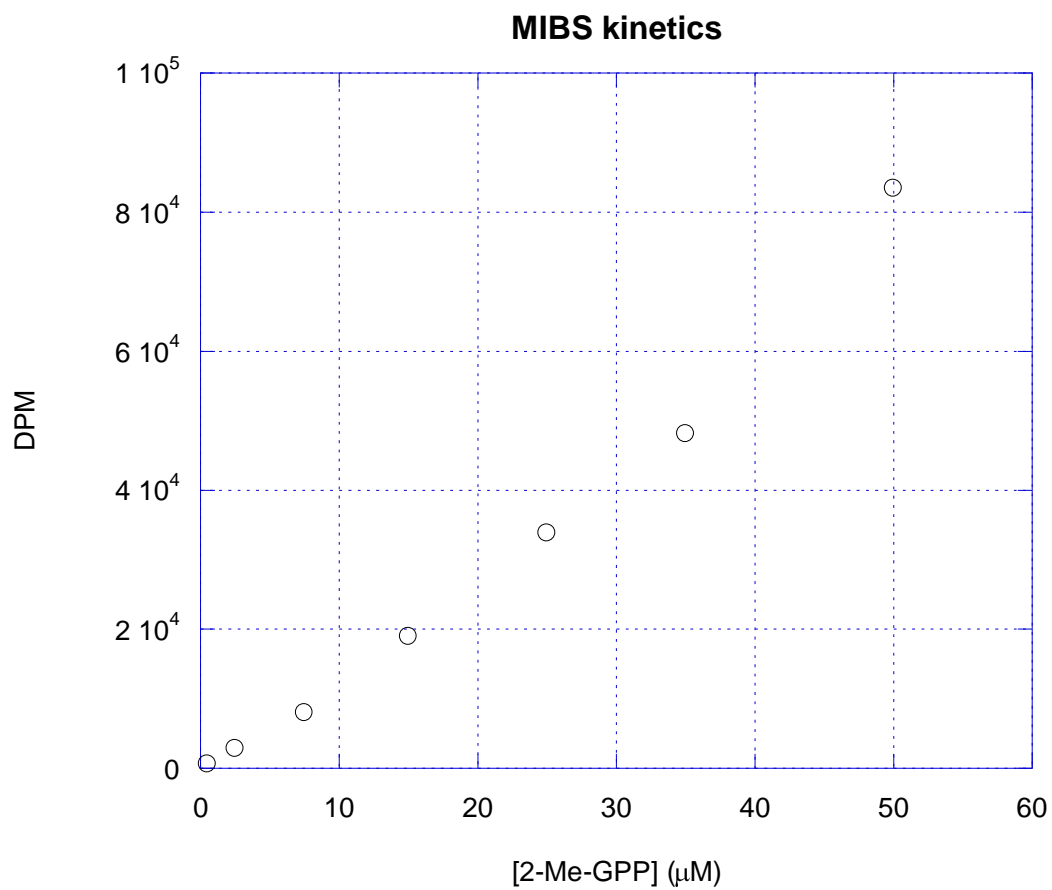

Figure S6. Plot of the reaction velocity for the MIBS-catalyzed formation of MIB (**3**) as a function of the concentration of 2-Me-GPP (**2**) at sub-saturating concentrations of **2**.

Table S1. PCR primers and combination PCRs used throughout this study

| PCR primer combinations              | Sequence (5' – 3')                                     | Assay target                                                                           | Expected product size |
|--------------------------------------|--------------------------------------------------------|----------------------------------------------------------------------------------------|-----------------------|
| <b>GPPF1</b><br><b>MIBR1</b>         | GCGCAGTGAATATCAG<br>TATGCCATTCAAATGC                   | GPPMT and MIBS gene<br>order                                                           | 2057 bp               |
| <b>MIBF1</b><br><b>GPPR1</b>         | TGGATAATACGAGTACCAC<br>GTCAGCAACGATGAGC                | MIBS and GPPMT gene<br>order                                                           | 2078 bp               |
| <b>MIBF2</b><br><b>MIBR2</b>         | ATGAAAGATACCAACTTGGATAATA<br>TTAGGCTAGTGATTGTGAATCTGGC | MIBS                                                                                   | 1194 bp               |
| <b>GPPF2</b><br><b>GPPR2</b>         | GCGCAGTGAATATC<br>TTACCGAATGATGCGGTCAGCAACG            | GPPMT                                                                                  | 832 bp                |
| <b>PSANROS1F</b><br><b>PSANDDR1</b>  | ATGGCGGTTCTGGTCG<br>CTGTCGTCAGCATAGTAGTCATCAG          | Rossmann fold on<br>GPPMT and DDxxx(D/E)<br>Mg <sup>2+</sup> binding domain on<br>MIBS | 1118 bp               |
| <b>PSANROS1F</b><br><b>PSANNSER1</b> | ATGGCGGTTCTGGTCG<br>GGCAACCGAAAGGAGA                   | Rossmann fold on<br>GPPMT and NSE triad<br>Mg <sup>2+</sup> binding domain on<br>MIBS  | 1555 bp               |
| <b>PSAN562F</b><br><b>PSAN1140R</b>  | AACGATGTTACGGGAGG<br>ATCAAACCCGCATTCC                  | Spanning region<br>between GPPMT and<br>MIBS                                           | 704 bp                |



Table S2. Sequence comparison of *P. limnetica* (Castaic Lake, GenBank Accession HQ630883) MIBS with bacterial orthologs

| <b>Organism name</b>                                                                              | <b>GenBank</b>          | <b>aa</b> | <b>Identity</b> | <b>Positive matches</b> |
|---------------------------------------------------------------------------------------------------|-------------------------|-----------|-----------------|-------------------------|
|                                                                                                   | <b>Accession Number</b> |           | <b>(%)</b>      | <b>(%)</b>              |
| <b><i>Streptomyces</i> sp. AA4</b>                                                                | ZP_05479642             | 370       | 58              | 70                      |
| <b><i>Catenulispora acidiphila</i></b><br><b>DSM 44928</b>                                        | YP_003115314            | 393       | 53              | 68                      |
| <b><i>Nocardioopsis dassonvillei</i></b><br><b>subsp. <i>dassonvillei</i> DSM</b><br><b>43111</b> | ZP_04336204             | 442       | 41              | 56                      |
| <b><i>Micromonospora</i> sp. ATCC</b><br><b>39149</b>                                             | ZP_04609212             | 392       | 35              | 49                      |
| <b><i>Stackebrandtia</i></b><br><b><i>nassauensis</i> DSM 44728</b>                               | YP_003510780            | 373       | 37              | 49                      |

Table S3. Sequence comparison of *P. limnetica* (Castaic Lake, GenBank Accession HQ630882) GPPMT with bacterial orthologs

| Organism name                                                               | GenBank<br>Accession Number | aa  | Identity<br>(%) | Positive matches<br>(%) |
|-----------------------------------------------------------------------------|-----------------------------|-----|-----------------|-------------------------|
| <i>Micromonospora</i> sp. ATCC<br>39149                                     | ZP_04609213                 | 289 | 73              | 84                      |
| <i>Nocardiopsis dassonvillei</i><br>subsp. <i>dassonvillei</i> DSM<br>43111 | ZP_04336205                 | 286 | 72              | 84                      |
| <i>Saccharopolyspora</i><br><i>erythraea</i> NRRL 2338                      | YP_001105918                | 442 | 67              | 78                      |
| <i>Streptomyces</i> sp. AA4                                                 | ZP_05479643                 | 283 | 67              | 78                      |
| <i>Stackebrandtia</i><br><i>nassauensis</i> DSM 44728                       | YP_003510779                | 282 | 64              | 80                      |
| <i>Catenulispora acidiphila</i><br>DSM 44928                                | YP_003115315                | 282 | 64              | 80                      |

Table S4. Sequence comparison of *P. limnetica* (Castaic Lake, GenBank Accession HQ630884) nucleotide binding protein with bacterial orthologs

| <b>Organism name</b>                         | <b>GenBank</b>          | <b>aa</b> | <b>Identity</b> | <b>Positive matches</b> |
|----------------------------------------------|-------------------------|-----------|-----------------|-------------------------|
|                                              | <b>Accession Number</b> |           | <b>(%)</b>      | <b>(%)</b>              |
| <i>Streptomyces avermitilis</i>              | NP_824183               | 468       | 60              | 78                      |
| <i>Saccharopolyspora erythraea</i> NRRL 2338 | YP_001106174            | 466       | 60              | 76                      |
| <i>Saccharopolyspora erythraea</i> NRRL 2338 | YP_001107099            | 466       | 60              | 77                      |
| <i>Frankia alni</i> ACN14a                   | YP_716635               | 475       | 60              | 75                      |
| <i>Streptomyces coelicolor</i> A3(2)         | NP_629395               | 468       | 58              | 76                      |
| <i>Frankia</i> sp. Ccl3                      | YP_483305               | 467       | 60              | 77                      |
| <i>Streptomyces griseus</i>                  | BAB20506                | 470       | 58              | 75                      |

Table S5. Sequence comparison of *O. limosa* and *P. limnetica* (Lake Biwa) MIB synthases (GenBank Accession numbers HQ630885 and HQ630887 respectively) with closest related bacterial orthologs

| <b>Organism name</b>                                                                              | <b>GenBank</b>          | <b>aa</b> | <b>Identity</b> | <b>Positive matches</b> |
|---------------------------------------------------------------------------------------------------|-------------------------|-----------|-----------------|-------------------------|
|                                                                                                   | <b>Accession Number</b> |           | <b>(%)</b>      | <b>(%)</b>              |
| <b><i>Streptomyces</i> sp. AA4</b>                                                                | ZP_05479642             | 370       | 61              | 71                      |
| <b><i>Catenulispora acidiphila</i></b><br><b>DSM 44928</b>                                        | YP_003115314            | 393       | 54              | 68                      |
| <b><i>Nocardioopsis dassonvillei</i></b><br><b>subsp. <i>dassonvillei</i> DSM</b><br><b>43111</b> | ZP_04336204             | 442       | 42              | 57                      |
| <b><i>Micromonospora</i> sp. ATCC</b><br><b>39149</b>                                             | ZP_04609212             | 392       | 36              | 53                      |
| <b><i>Stackebrandtia</i></b><br><b><i>nassauensis</i> DSM 44728</b>                               | YP_003510780            | 373       | 37              | 50                      |

Table S6. Sequence comparison of of *O. limosa* and *P. limnetica* (Lake Biwa) GPPMTs (GenBank Accession numbers HQ630886 and HQ630888 respectively) with closest related bacterial orthologs.

| Organism name                                                               | Genebank<br>Accession Number | aa  | Identity<br>(%) | Positive matches<br>(%) |
|-----------------------------------------------------------------------------|------------------------------|-----|-----------------|-------------------------|
| <i>Micromonospora</i> sp. ATCC<br>39149                                     | ZP_04609213                  | 289 | 74              | 84                      |
| <i>Nocardiopsis dassonvillei</i><br>subsp. <i>dassonvillei</i> DSM<br>43111 | ZP_04336205                  | 286 | 72              | 84                      |
| <i>Stackebrandtia</i><br><i>nassauensis</i> DSM 44728                       | YP_003510779                 | 282 | 68              | 81                      |
| <i>Streptomyces</i> sp. AA4                                                 | ZP_05479643                  | 283 | 66              | 77                      |
| <i>Saccharopolyspora</i><br><i>erythraea</i> NRRL 2338                      | YP_001105918                 | 442 | 65              | 76                      |
| <i>Catenulispora acidiphila</i><br>DSM 44928                                | YP_003115315                 | 282 | 62              | 77                      |

Table S7. Sequence comparison of *P. limnetica* MIBS (Castaic Lake, GenBank Accession HQ630883) with MIB synthases cloned in this study, and closest bacterial ortholog.

| Organism name                   | Genebank<br>Accession Number | aa  | Identity<br>(%) | Positive matches<br>(%) |
|---------------------------------|------------------------------|-----|-----------------|-------------------------|
| <i>Streptomyces</i> sp. AA4     | ZP_05479642                  | 370 | 60              | 71                      |
| <i>P. limnetica</i> (Lake Biwa) | HQ630887                     | 379 | 97              | 98                      |
| <i>O. limosa</i>                | HQ630885                     | 359 | 94              | 95                      |

Table S8. Sequence comparison *P. limnetica* GPPMT (Castaic Lake, GenBank Accession HQ630882) with GPPMTs cloned in this study, and closest bacterial ortholog.

| Organism name                           | Genebank<br>Accession Number | aa  | Identity<br>(%) | Positive matches<br>(%) |
|-----------------------------------------|------------------------------|-----|-----------------|-------------------------|
| <i>Micromonospora</i> sp. ATCC<br>39149 | ZP_04609213                  | 289 | 74              | 84                      |
| <i>P. limnetica</i> (Lake Biwa)         | HQ630888                     | 257 | 96              | 99                      |
| <i>O. limosa</i>                        | HQ630886                     | 257 | 96              | 99                      |
